# Supplementary material
Source: Elsevier journal article supplement (https://www.sciencedirect.com/science/article/pii/S0300289619300675)
Supplement: mmc1 [file S0300289619300675:mmc1.docx]

**Anexos**

*Tabla 1. Resultados y medida de indicadores seleccionados*

| **Indicador** | **Fórmula** | **Número de registros** | **Número centros con respuesta** | **Indicador global** | **Indicador referencia** |
| --- | --- | --- | --- | --- | --- |
| **FQ** | Número anual de exacerbaciones graves / Total de pacientes atendidos en el año | 244 pac | 3 | 0,19 | <1 |
| **BFC** | Numero de broncoscopias prioritarias realizadas en un máximo de 7 días desde la indicación / Número de broncoscopias prioritarias demandadas (%). | 345 pac | 8 | 0,84 | >85% |
| **TEP** | Nº total defunciones de pacientes ingresados por TEP / Nº total de alta con el diagnóstico de TEP X100 | *N insuficiente* |  |  | <10% |
| **PEDIATRÍA** | Nº niños asmáticos en los que se valora el grado de control del asma / Nº niños con asma atendidos X100 | 222 pac | *7* | 0,86 | >85% |
| **EPID** | Nº total de pacientes diagnosticados de EPID con TACAR informada según grado de certeza / Nº total de pacientes diagnosticados de EPID con TACAR x 100 | 183 pac | 7 | 0,97 | >85% |
| **EPOC** | Nº pacientes diagnosticados de EPOC con espirometría con test BD/Nº total de pacientes diagnosticados de EPOC x 100 | 483 pac | 11 | 0,87 | >90% |
| **INFECCIONES** | Número total de pacientes con NAC en los que se ha calculado una escala pronóstica (PSI, CURB65 o CRB65) / Número total de pacientes con NAC x 100 | 287 pac | 8 | 0,43 | >85% |
| **PLEURA** | Número de toracocentesis con consentimiento informado/ Número total de toracocentesis realizadas X 100 | 289 pac | 7 | 0,58 | >90% |
| **ENFERMERÍA** | Nº de enfermeras con formación específica / nº de enfermeras que realizan espirometrías x 100 |  | 9 | 0,92 | >85% |
| **TABAQUISMO** | Número de historias clínicas con registro hábito tabáquico / Nº de personas atendidas en el año X 100 | 380 pac | 8 | 0,9 | >90% |
| **ASMA** | Nº total de pacientes asmáticos que completan cuestionario validado de control / Nº total de pacientes asmáticos valorados en consulta en un año x100 | 302 pac | 10 | 0,81 | >85% |
| **SUEÑO Y VMNI** | (Número de pacientes cuyo intervalo entre petición de la prueba de sueño y la realización de la misma es inferior a 60 días hábiles / Número total de pacientes diagnosticados de SAHS) x100 | 450 pac | 8 | 0,42 | >85% |
| **CA. PULMÓN** | (Número de pacientes cuyo intervalo entre la petición de valoración por Neumología ante sospecha de cáncer de pulmón y la realización de la misma es igual o inferior a ocho días hábiles/Número total de pacientes diagnosticados de cáncer de pulmón) x100 | 357 pac | 9 | 0,95 | >90% |
